# Supplementary material for: Synthesis of a magnetic crown ether ion imprinted polymer material for the selective adsorption of lithium
Source: Royal Society of Chemistry journal article supplement (doi:10.1039/d2nj05377b), 2022-12-27
Supplement: d2nj05377b1.pdf [file d2nj05377b1.pdf]

## Supplementary data

### Synthesis of magnetic crown ether ion imprinted polymers material for selective adsorption of lithium

Yuhong Huang <sup>a</sup>, Xiaowei Li <sup>a</sup>, Linlin Chen <sup>a</sup>, Guiling Luo <sup>a</sup>, Duanjian Tao <sup>b</sup>,  
Jing Sun <sup>a</sup>, Zhenjiang Qiu <sup>c</sup>, Yanhong Chao <sup>c\*</sup>, Wenshuai Zhu <sup>a, c, d\*</sup>

<sup>a</sup> School of Chemistry and Chemical Engineering, Jiangsu University, 301 Xuefu Road, Zhenjiang 212013, PR China.

<sup>b</sup> A College of Chemistry and Chemical Engineering, Jiangxi Normal University, Nanchang 330022 P. R. China.

<sup>c</sup> College of Science, State Key Laboratory of Heavy Oil Processing, China University of Petroleum-Beijing, Beijing 102249, P.R. China.

<sup>d</sup> College of Chemical Engineering and Environment, State Key Laboratory of Heavy Oil Processing, China University of Petroleum-Beijing, Beijing 102249, P.R. China.

<sup>e</sup> Longquan Jinhong Porcelain Ind Co. Ltd, Longquan 323700, Peoples R China.

Corresponding authors E-mail: chaoyh@cup.edu.cn (Y. H. Chao);  
zhuws@cup.edu.cn (W.S. Zhu).

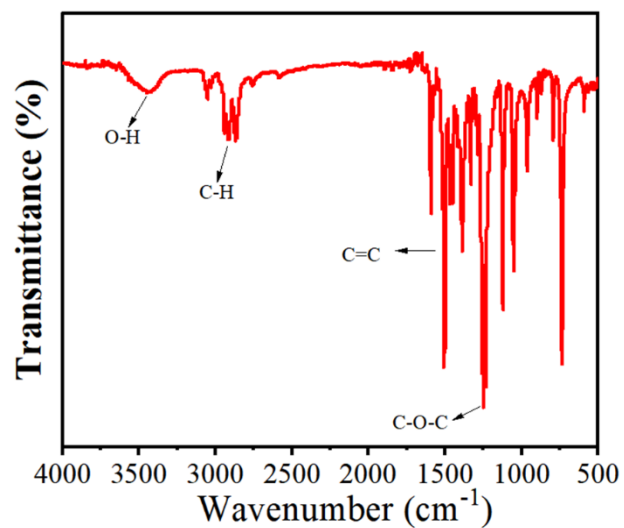

Figure S1. FT-IR spectra of DB14C4-OH. FT-IR: O-H (3340 cm<sup>-1</sup>), C-H (2920 cm<sup>-1</sup>), C=C (1510 cm<sup>-1</sup>), C-O-C (1250 cm<sup>-1</sup>).

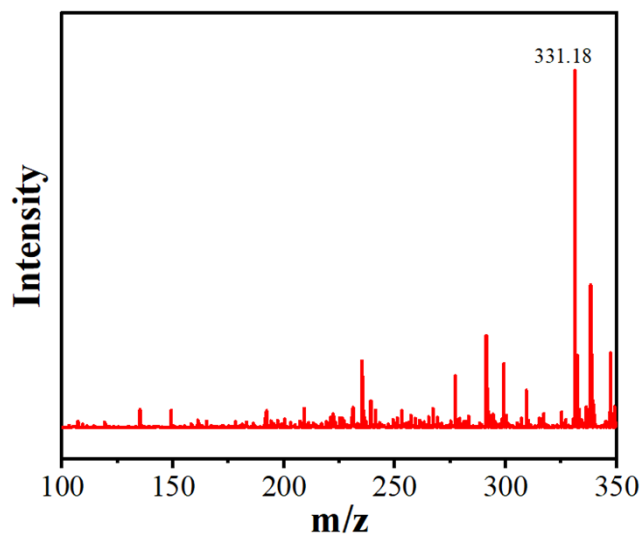

Figure S2. Mass spectrometry analysis of DB14C4-OH.

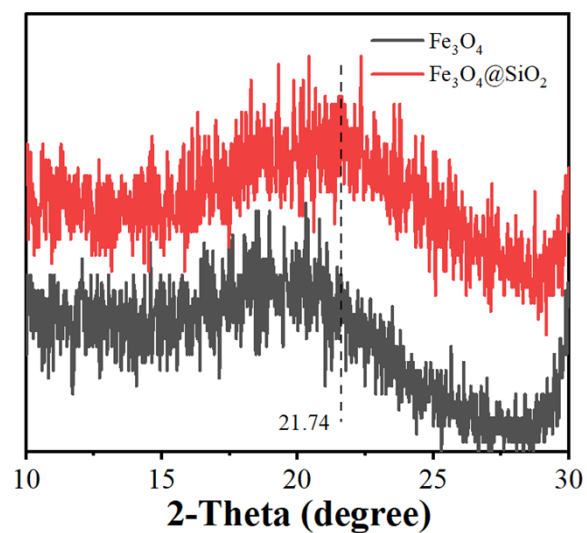

Figure S3.  $\text{Fe}_3\text{O}_4$  and  $\text{Fe}_3\text{O}_4@\text{SiO}_2$  partial amplification of the XRD pattern.

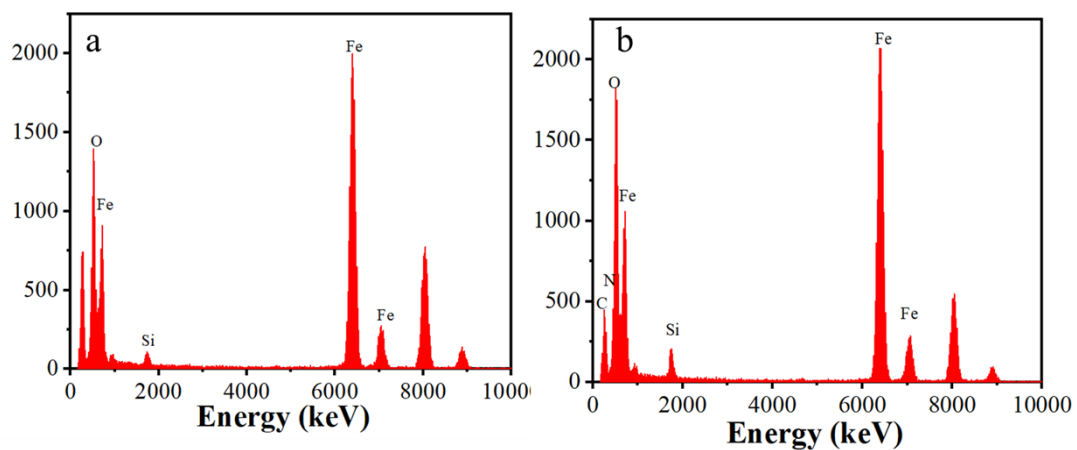

Figure S4 EDS spectrum of  $\text{Fe}_3\text{O}_4@\text{SiO}_2$  (a) and  $\text{OS}@\text{FeSi}$  (b).
